# Supplementary material for: When mutants gain new powers: news from the mutant p53 field
Source: Springer Nature journal article supplement (doi:10.1038/nrc2693), 2009-08-20
Supplement: 41568_2009_BFnrc2693_MOESM195_ESM.pdf [file 41568_2009_BFnrc2693_MOESM195_ESM.pdf]

| Cancer site          | <i>p53</i> mutations associated with:                                                                                                                                                                                          |                                                                                                   |                    |
|----------------------|--------------------------------------------------------------------------------------------------------------------------------------------------------------------------------------------------------------------------------|---------------------------------------------------------------------------------------------------|--------------------|
|                      | Bad outcome                                                                                                                                                                                                                    | No association                                                                                    | Good outcome       |
| Bladder              | 18425359, 18367096, 16624482, 15308588, 10355250, 17982131,                                                                                                                                                                    | 17088904, 16061860, 9649138,                                                                      |                    |
| Brain                | 16818615, 15929038, 14734474                                                                                                                                                                                                   | 11832530, 12006527, 12124823, 11519857                                                            | 11939587, 11504770 |
| Breast               | 18465328, 18465328, 16818855, 15802278, 14701769, 14997055, 12792793, 21182755, 11489795, 10690522, 10719737, 10719728, 11051239, 10448289, 10615230, 10629655, 10567903, 9569050, 9537247, 7489358, 7882357, 8102535, 8453635 | 16818855, 17129383, 11859874, 9815649, 8156519                                                    |                    |
| Colorectum           | 17259658, 16231316, 16287491, 15172127, 14627345, 12433709, 11295071, 10760757, 10080604, 9516972, 9751268, 7585578, 16524972, 15586226                                                                                        | 15843421, 15998951, 21182915, 21203669, 11044641, 10334521                                        |                    |
| Head & Neck          | 18094376, 12509970, 12726864, 21225878, 10637254, 10735894, 9582015, 18487080                                                                                                                                                  | 16024113                                                                                          |                    |
| Hematopoietic System | 18596741, 18843282, 18689542, 15684603, 16014569, 12792784, 12060632, 21142871, 11703325, 17881637, 18706692, 18628487, 17881637, 17215851                                                                                     |                                                                                                   |                    |
| Lung                 | 12837832, 11410513, 10741731, 10830574, 10554037, 10023676, 9627113, 9416838, 19434453                                                                                                                                         | 19096301, 18024870, 18024870, 16989164, 16499995, 15671551, 10945494, 10861503, 99061423, 7615358 |                    |
| Ovary                | 16183105, 16322298, 15043303, 15221786, 14519637, 11595686, 11064359, 18172257, 17488735, 16969087                                                                                                                             | 14760384, 11720475, 17171684                                                                      | 14551300, 16459017 |

\* Numbers in table correspond to PubMed Identifiers (PMID)
